# Supplementary material for: Efficient Reduction of Food Related Mould Spores on Surfaces by Hydrogen Peroxide Mist
Source: MDPI journal article supplement (doi:10.3390/foods10010055), 2020-12-28
Supplement: s1 [file s1]

## Supplementary File

**Table S1.** Fungicidal effect of H<sub>2</sub>O<sub>2</sub> mist disinfection (2 h) against mould spores in food soils or dH<sub>2</sub>O (control) dried on stainless steel.

| Mould/Soil                 | Log Reduction                |      |      |              |      |      |        |      |      |            |      |      |
|----------------------------|------------------------------|------|------|--------------|------|------|--------|------|------|------------|------|------|
|                            | qdH <sub>2</sub> O (Control) |      |      | 2% Skim Milk |      |      | 3% BSA |      |      | Meat Juice |      |      |
|                            | 1 *                          | 2    | 3    | 1            | 2    | 3    | 1      | 2    | 3    | 1          | 2    | 3    |
| <i>Penicillium solitum</i> | >3.0                         | >3.0 | >3.0 | >3.0         | >3.0 | >3.0 | >3.0   | >3.0 | >3.0 | >3.0       | 0.63 | 0.26 |
| <i>Mucor plumbeus</i>      | 1.66                         | 1.79 | >3.0 | 1.13         | 0.7  | >3.0 | 2.72   | 1.8  | >3.0 | 2.09       | 0.67 | 2.09 |

\* Three replicates perform for each treatment.
